# Supplementary material for: Dancing Against falls iN Community-dwElling older adults (DANCE): a study protocol of a stratified, block-randomised trial
Source: HighWire-hosted journal article supplement (doi:10.1136/injuryprev-2021-044224), 2021-09-20
Supplement: injuryprev-2021-044224supp001_data_supplement.pdf [file injuryprev-2021-044224supp001_data_supplement.pdf]

## Captions for figures and tables

*Figure 1: Flowchart of the study flow*

*Table 1: Administrative information on the DANCE study*

*Table 2: List of assessments*

*Table 3: Schedule for enrollment, allocation, intervention, and assessment. DANCE, Dancing against fall Accidents iN Community-dwelling older adults.*
